# Supplementary material for: Liver sinusoidal endothelial cell expressed vascular cell adhesion molecule 1 promotes liver fibrosis
Source: PubMed Central journal article supplement (PMC9453231; doi:10.3389/fimmu.2022.983255), 2022-08-25

## *Supplementary Material*

### **Liver Sinusoidal Endothelial Cell Expressed Vascular Cell Adhesion Molecule 1 (VCAM1) Promotes Liver Fibrosis**

**Qianqian Guo<sup>1†</sup>, Kunimaro Furuta<sup>2†</sup>, Shahidul Islam<sup>1</sup>, Nunzia Caporarello<sup>3</sup>, Enis Kostallari<sup>1</sup>, Kobe Dielis<sup>1</sup>, Daniel J. Tschumperlin<sup>3</sup>, Petra Hirsova<sup>1</sup>, Samar H. Ibrahim<sup>1, 4\*</sup>**

<sup>1</sup>Division of Gastroenterology & Hepatology, Mayo Clinic, Rochester, Minnesota, USA

<sup>2</sup> Department of Gastroenterology and Hepatology, Osaka University Graduate School of Medicine, Osaka, Japan

<sup>3</sup>Department of Physiology and Biomedical Engineering, Mayo Clinic, Rochester, Minnesota, USA

<sup>4</sup> Division of Pediatric Gastroenterology, Mayo Clinic, Rochester, Minnesota, USA

**Table 1**

**PCR primers**

| <b>Name</b>                         | <b>Sequence</b>         |
|-------------------------------------|-------------------------|
| Mouse <i>Cd68</i> Forward Primer    | TGTCTGATCTTGCTAGGACCG   |
| Mouse <i>Cd68</i> Reverse Primer    | GAGAGTAACGGCCTTTTTGTGA  |
| Mouse <i>Ccr2</i> Forward Primer    | ATCCACGGCATACTATCAACATC |
| Mouse <i>Ccr2</i> Reverse Primer    | CAAGGCTCACCATCATCGTAG   |
| Mouse <i>Coll1a1</i> Forward Primer | GCTCCTCTTAGGGGCCACT     |
| Mouse <i>Coll1a1</i> Reverse Primer | CCACGTCTCACCATTGGGG     |
| <i>18S</i> Forward Primer           | CGCTTCCTTACCTGGTTGAT    |
| <i>18S</i> Reverse Primer           | GAGCGACCAAAGGAACCATA    |

|                                                   |                           |
|---------------------------------------------------|---------------------------|
| Mouse <i>Cd34</i> Forward Primer                  | AAGGCTGGGTGAAGACCCTTA     |
| Mouse <i>Cd34</i> Reverse Primer                  | TGAATGGCCGTTTCTGGAAGT     |
| Mouse <i>Timp1</i> Forward Primer                 | AGGTGGTCTCGTTGATTTCT      |
| Mouse <i>Timp1</i> Reverse Primer                 | GTAAGGCCTGTAGCTGTGCC      |
| Mouse <i>Coll1a1</i> Forward Primer               | GCTCCTCTTAGGGGCCACT       |
| Mouse <i>Coll1a1</i> Reverse Primer               | CCACGTCTCACCATTGGGG       |
| Mouse <i>Acta2</i> ( $\alpha$ SMA) Forward Primer | GTCCCAGACATCAGGGAGTAA     |
| Mouse <i>Acta2</i> ( $\alpha$ SMA) Reverse Primer | TCGGATACTTCAGCGTCAGGA     |
| Mouse <i>Pdgfrb</i> Forward Primer                | ACTACATCTCCAAAGGCACCT     |
| Mouse <i>Pdgfrb</i> Reverse Primer                | TGTAGAACTGGTCGTTTCATGGGCA |
| Human <i>YAP1</i> Forward Primer                  | CCCTCGTTTTGCCATGAACC      |
| Human <i>YAP1</i> Reverse Primer                  | TGCCGAAGCAGTTCTTGCTG      |
| Human <i>CTGF</i> Forward Primer                  | GCAGCGGAGAGTCCTTCCAG      |
| Human <i>CTGF</i> Reverse Primer                  | GGGCCAAACGTGTCTTCCAG      |
| Human <i>ANKRD1</i> Forward Primer                | TGATTATGTATGGCGCGGATCT    |
| Human <i>ANKRD1</i> Reverse Primer                | GCGAGAGGTCTTGTAGGAGTTC    |
| Human <i>COL1A1</i> Forward Primer                | TGTGAGGCCACGCATGAG        |
| Human <i>COL1A1</i> Reverse Primer                | CAGATCACGTCATCGCACAA      |
| Human <i>TIMP1</i> Forward Primer                 | CTTCTGGCATCCTGTTGTTG      |
| Human <i>TIMP1</i> Reverse Primer                 | GGTATAAGGTGGTCTGGTTG      |

|                                    |                       |
|------------------------------------|-----------------------|
| Human <i>PDGFRA</i> Forward Primer | TGGCAGTACCCCATGTCTGAA |
| Human <i>PDGFRA</i> Reverse Primer | CCAAGACCGTCACAAAAAGGC |
| Human <i>PDGFRB</i> Forward Primer | AGCACCTTCGTTCTGACCTG  |
| Human <i>PDGFRB</i> Reverse Primer | TATTCTCCCGTGTCTAGCCCA |

**Supplementary Figure 1. Liver sinusoidal endothelial cells *Lyve1* expression is reduced in liver injury.** Quantification of immunostaining of *Lyve1* on liver sections from (A) CD-HFD induced NASH mouse model and (B) CCl<sub>4</sub> induced liver fibrosis mouse model. Scale bar: 50µm, n=5-6. (C) Representative images of co-immuno staining of *Lyve1* and  $\alpha$ SMA in liver sections from CD-HFD or chow fed mice. Scale bar: 10 µm, left & middle panels. 5 µm, right panel, n=3.

**Supplementary Figure 1**

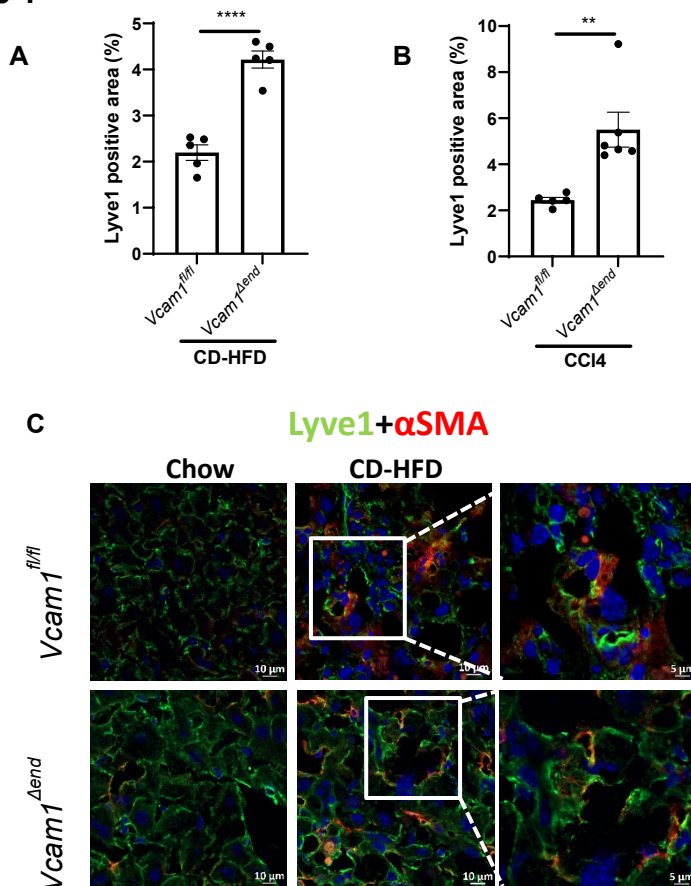

**Supplementary Figure 2:** (A) hHSCs were treated with vehicle or 5 ng/ml of human recombinant TGF $\beta$  for 16 hours. Protein expressions of fibronectin and  $\alpha$ -SMA were examined by Western blot. Heat shock cognate 70 (HSC70) was used as a loading control.

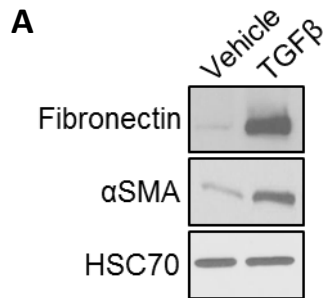

Supplement: DataSheet_1.pdf [file DataSheet_1.pdf]
